# Supplementary material
Source: PubMed Central journal article supplement (PMC3769196)
Supplement: NIHMS476054-supplement-1.pdf [file NIHMS476054-supplement-1.pdf]

## Supplemental Material

Supplemental Table. Sarcomere mutations present in the study cohort.

| <b>Gene</b>           | <b>Mutation</b>         | <b># of Families</b> | <b># of Subjects</b> |
|-----------------------|-------------------------|----------------------|----------------------|
| <i>MYH7</i><br>(n=20) | Ala797Thr               | 1                    | 2                    |
|                       | Arg249Gln               | 1                    | 1                    |
|                       | Arg858Gly               | 1                    | 1                    |
|                       | Glu497Asp               | 1                    | 1                    |
|                       | Gly584Arg               | 1                    | 1                    |
|                       | Gly768Arg               | 1                    | 1                    |
|                       | Lys847del               | 1                    | 1                    |
|                       | Arg663Cys               | 2                    | 2                    |
|                       | Val338Met               | 1                    | 1                    |
|                       | Val39Met                | 1                    | 2                    |
|                       | Ser291Phe               | 1                    | 2                    |
|                       | Arg249Gln               | 1                    | 1                    |
|                       | Arg870His               | 1                    | 1                    |
|                       | Arg652Gly               | 1                    | 1                    |
|                       | Arg453Cys               | 1                    | 1                    |
|                       | Val1459Asn              | 1                    | 1                    |
|                       | <i>MYBPC3</i><br>(n=39) | 927-9G>A             | 1                    |
| Val771Ala             |                         | 1                    | 1                    |
| Leu1014fs             |                         | 1                    | 1                    |
| Arg502Gln             |                         | 2                    | 2                    |
| Gly531Arg             |                         | 1                    | 1                    |
| 3190+1 G>A            |                         | 2                    | 2                    |
| Gln969X               |                         | 1                    | 2                    |
| Trp1112Stop           |                         | 1                    | 1                    |
| Ser858Asn             |                         | 1                    | 2                    |
| 927-9G>A              |                         | 3                    | 3                    |
| Phe1246fs             |                         | 1                    | 1                    |
| 3190+2T>G             |                         | 1                    | 1                    |
| Arg810His             |                         | 1                    | 1                    |
| Pro1208fs             |                         | 1                    | 1                    |
| Glu258Lys             |                         | 2                    | 4                    |
| Arg502Trp             |                         | 2                    | 2                    |
| Pro699fs              |                         | 1                    | 1                    |
| Gly1248_Cys1253dup    |                         | 1                    | 1                    |
| K1209fs               |                         | 1                    | 1                    |
| Asp7Asn               |                         | 1                    | 1                    |
| Gly531Arg             |                         | 1                    | 1                    |
| 1298-2A>G             |                         | 1                    | 1                    |
| Asp770Asn             |                         | 1                    | 1                    |
| Pro955fs              |                         | 1                    | 1                    |
| Gln60fs               |                         | 1                    | 1                    |
| Asp605Asn             |                         | 1                    | 1                    |
| Arg943X               |                         | 1                    | 1                    |
| <i>TNNT2</i><br>(n=5) | Arg92Trp                | 1                    | 2                    |
|                       | Arg278Cys               | 1                    | 3                    |
| <i>TNNI3</i>          | Asp196Asn               | 1                    | 1                    |

|                      |           |   |   |
|----------------------|-----------|---|---|
| (n=1)                |           |   |   |
| <i>MYL2</i><br>(n=1) | Glu65Lys  | 1 | 1 |
| <i>MYL3</i><br>(n=1) | Val156Met | 1 | 1 |
