# Supplementary material
Source: PubMed Central journal article supplement (PMC3769196)
Supplement: NIHMS476054-supplement-2.pdf [file NIHMS476054-supplement-2.pdf]

## Parsed Citations

**Seidman JG, Seidman C. The genetic basis for cardiomyopathy: from mutation identification to mechanistic paradigms. Cell. 2001;104:557-567.**

PubMed: <http://www.ncbi.nlm.nih.gov/pubmed/11239412?dopt=abstract>

CrossRef: <http://dx.doi.org/10.1016%2FS0092-8674%2801%2900242-2>

Google Scholar: [Author Only Title Only Author and Title](#)

**Richard P, Villard E, Charron P, Isnard R. The genetic bases of cardiomyopathies. J Am Coll Cardiol. 2006;48:A79-89.**

CrossRef: <http://dx.doi.org/10.1016%2Fj.jacc.2006.09.014>

Google Scholar: [Author Only Title Only Author and Title](#)

**Ho CY, Sweitzer NK, McDonough B, Maron BJ, Casey SA, Seidman JG, Seidman CE, Solomon SD. Assessment of diastolic function with Doppler tissue imaging to predict genotype in preclinical hypertrophic cardiomyopathy. Circulation. 2002;105:2992-2997.**

PubMed: <http://www.ncbi.nlm.nih.gov/pubmed/12081993?dopt=abstract>

CrossRef: <http://dx.doi.org/10.1161%2F01.CIR.0000019070.70491.6D>

Google Scholar: [Author Only Title Only Author and Title](#)

**Ho CY, Carlsen C, Thune JJ, Havndrup O, Bundgaard H, Farrohi F, Rivero J, Cirino AL, Andersen PS, Christiansen M, Maron BJ, Orav EJ, Kober L. Echocardiographic Strain Imaging to Assess Early and Late Consequences of Sarcomere Mutations in Hypertrophic Cardiomyopathy. Circulation: Cardiovascular Genetics. 2009;2:314-321.**

PubMed: <http://www.ncbi.nlm.nih.gov/pubmed/20031602?dopt=abstract>

Google Scholar: [Author Only Title Only Author and Title](#)

**Crilley JG, Boehm EA, Blair E, Rajagopalan B, Blamire AM, Styles P, McKenna WJ, Ostman-Smith I, Clarke K, Watkins H. Hypertrophic cardiomyopathy due to sarcomeric gene mutations is characterized by impaired energy metabolism irrespective of the degree of hypertrophy. J Am Coll Cardiol. 2003;41:1776-1782.**

PubMed: <http://www.ncbi.nlm.nih.gov/pubmed/12767664?dopt=abstract>

CrossRef: <http://dx.doi.org/10.1016%2FS0735-1097%2802%2903009-7>

Google Scholar: [Author Only Title Only Author and Title](#)

**Basso C, Thiene G, Corrado D, Buja G, Melacini P, Nava A. Hypertrophic cardiomyopathy and sudden death in the young: pathologic evidence of myocardial ischemia. Human pathology. 2000;31:988-998.**

PubMed: <http://www.ncbi.nlm.nih.gov/pubmed/10987261?dopt=abstract>

CrossRef: <http://dx.doi.org/10.1053%2Fhupa.2000.16659>

Google Scholar: [Author Only Title Only Author and Title](#)

**Shirani J, Pick R, Roberts WC, Maron BJ. Morphology and significance of the left ventricular collagen network in young patients with hypertrophic cardiomyopathy and sudden cardiac death. J Am Coll Cardiol. 2000;35:36-44.**

PubMed: <http://www.ncbi.nlm.nih.gov/pubmed/10636256?dopt=abstract>

CrossRef: <http://dx.doi.org/10.1016%2FS0735-1097%2899%2900492-1>

Google Scholar: [Author Only Title Only Author and Title](#)

**Choudhury L, Mahrholdt H, Wagner A, Choi KM, Elliott MD, Klocke FJ, Bonow RO, Judd RM, Kim RJ. Myocardial scarring in asymptomatic or mildly symptomatic patients with hypertrophic cardiomyopathy. J Am Coll Cardiol. 2002;40:2156-2164.**

PubMed: <http://www.ncbi.nlm.nih.gov/pubmed/12505229?dopt=abstract>

CrossRef: <http://dx.doi.org/10.1016%2FS0735-1097%2802%2902602-5>

Google Scholar: [Author Only Title Only Author and Title](#)

**Varnava AM, Elliott PM, Mahon N, Davies MJ, McKenna WJ. Relation between myocyte disarray and outcome in hypertrophic cardiomyopathy. The American journal of cardiology. 2001;88:275-279.**

PubMed: <http://www.ncbi.nlm.nih.gov/pubmed/11472707?dopt=abstract>

CrossRef: <http://dx.doi.org/10.1016%2FS0002-9149%2801%2901640-X>

Google Scholar: [Author Only Title Only Author and Title](#)

**Varnava AM, Elliott PM, Sharma S, McKenna WJ, Davies MJ. Hypertrophic cardiomyopathy: the interrelation of disarray, fibrosis, and small vessel disease. Heart. 2000;84:476-482.**

PubMed: <http://www.ncbi.nlm.nih.gov/pubmed/11040002?dopt=abstract>

CrossRef: <http://dx.doi.org/10.1136%2Fheart.84.5.476>

Google Scholar: [Author Only Title Only Author and Title](#)

**Kim JB, Porreca GJ, Song L, Greenway SC, Gorham JM, Church GM, Seidman CE, Seidman JG. Polony multiplex analysis of gene expression (PMAGE) in mouse hypertrophic cardiomyopathy. Science. 2007;316:1481-1484.**

PubMed: <http://www.ncbi.nlm.nih.gov/pubmed/17556586?dopt=abstract>

CrossRef: <http://dx.doi.org/10.1126%2Fscience.1137325>

Google Scholar: [Author Only Title Only Author and Title](#)

**Ho CY, Lopez B, Coelho-Filho OR, Lakdawala NK, Cirino AL, Jarolim P, Kwong R, Gonzalez A, Colan SD, Seidman JG, Diez J, Seidman CE. Myocardial fibrosis as an early manifestation of hypertrophic cardiomyopathy. N Engl J Med. 2010;363:552-563.**

PubMed: <http://www.ncbi.nlm.nih.gov/pubmed/20818890?dopt=abstract>

CrossRef: <http://dx.doi.org/10.1056%2FNEJMoa1002659>

Google Scholar: [Author Only Title Only Author and Title](#)

**Kim RJ, Fieno DS, Parrish TB, Harris K, Chen EL, Simonetti O, Bundy J, Finn JP, Klocke FJ, Judd RM. Relationship of MRI delayed contrast enhancement to irreversible injury, infarct age, and contractile function. Circulation. 1999;100:1992-2002.**

PubMed: <http://www.ncbi.nlm.nih.gov/pubmed/10556226?dopt=abstract>

CrossRef: <http://dx.doi.org/10.1161%2F01.CIR.100.19.1992>

Google Scholar: [Author Only Title Only Author and Title](#)

**Flacke SJ, Fischer SE, Lorenz CH. Measurement of the gadopentetate dimeglumine partition coefficient in human myocardium in vivo: normal distribution and elevation in acute and chronic infarction. Radiology. 2001;218:703-710.**

PubMed: <http://www.ncbi.nlm.nih.gov/pubmed/11230643?dopt=abstract>

Google Scholar: [Author Only Title Only Author and Title](#)

**Kim RJ, Chen EL, Lima JA, Judd RM. Myocardial Gd-DTPA kinetics determine MRI contrast enhancement and reflect the extent and severity of myocardial injury after acute reperfused infarction. Circulation. 1996;94:3318-3326.**

PubMed: <http://www.ncbi.nlm.nih.gov/pubmed/8989146?dopt=abstract>  
CrossRef: <http://dx.doi.org/10.1161%2F01.CIR.94.12.3318>  
Google Scholar: [Author Only Title Only Author and Title](#)

**Moon JC, McKenna WJ, McCrohon JA, Elliott PM, Smith GC, Pennell DJ. Toward clinical risk assessment in hypertrophic cardiomyopathy with gadolinium cardiovascular magnetic resonance. J Am Coll Cardiol. 2003;41:1561-1567.**

PubMed: <http://www.ncbi.nlm.nih.gov/pubmed/12742298?dopt=abstract>  
CrossRef: <http://dx.doi.org/10.1016%2FS0735-1097%2803%2900189-X>  
Google Scholar: [Author Only Title Only Author and Title](#)

**Moon JC, Mogensen J, Elliott PM, Smith GC, Elkington AG, Prasad SK, Pennell DJ, McKenna WJ. Myocardial late gadolinium enhancement cardiovascular magnetic resonance in hypertrophic cardiomyopathy caused by mutations in troponin I. Heart. 2005;91:1036-1040.**

PubMed: <http://www.ncbi.nlm.nih.gov/pubmed/16020591?dopt=abstract>  
CrossRef: <http://dx.doi.org/10.1136%2Fhrt.2004.041384>  
Google Scholar: [Author Only Title Only Author and Title](#)

**Adabag AS, Maron BJ, Appelbaum E, Harrigan CJ, Buros JL, Gibson CM, Lesser JR, Hanna CA, Udelson JE, Manning WJ, Maron MS. Occurrence and frequency of arrhythmias in hypertrophic cardiomyopathy in relation to delayed enhancement on cardiovascular magnetic resonance. J Am Coll Cardiol. 2008;51:1369-1374.**

PubMed: <http://www.ncbi.nlm.nih.gov/pubmed/18387438?dopt=abstract>  
CrossRef: <http://dx.doi.org/10.1016%2Fj.jacc.2007.11.071>  
Google Scholar: [Author Only Title Only Author and Title](#)

**Maron MS, Appelbaum E, Harrigan CJ, Buros JL, Gibson CM, Hanna CA, Lesser JR, Udelson JE, Manning WJ, Maron BJ. Clinical Profile and Significance of Delayed Enhancement in Hypertrophic Cardiomyopathy. Circ Heart Fail. 2008;1:184-191.**

CrossRef: <http://dx.doi.org/10.1161%2FCIRCHEARTFAILURE.108.768119>  
Google Scholar: [Author Only Title Only Author and Title](#)

**Rudolph A, Abdel-Aty H, Bohl S, Boye P, Zagrosek A, Dietz R, Schulz-Menger J. Noninvasive detection of fibrosis applying contrast-enhanced cardiac magnetic resonance in different forms of left ventricular hypertrophy relation to remodeling. J Am Coll Cardiol. 2009;53:284-291.**

PubMed: <http://www.ncbi.nlm.nih.gov/pubmed/19147047?dopt=abstract>  
CrossRef: <http://dx.doi.org/10.1016%2Fj.jacc.2008.08.064>  
Google Scholar: [Author Only Title Only Author and Title](#)

**Bruder O, Wagner A, Jensen CJ, Schneider S, Ong P, Kispert EM, Nassenstein K, Schlosser T, Sabin GV, Sechtem U, Mahrholdt H. Myocardial scar visualized by cardiovascular magnetic resonance imaging predicts major adverse events in patients with hypertrophic cardiomyopathy. J Am Coll Cardiol. 2010;56:875-887.**

PubMed: <http://www.ncbi.nlm.nih.gov/pubmed/20667520?dopt=abstract>  
CrossRef: <http://dx.doi.org/10.1016%2Fj.jacc.2010.05.007>  
Google Scholar: [Author Only Title Only Author and Title](#)

**O'Hanlon R, Grasso A, Roughton M, Moon JC, Clark S, Wage R, Webb J, Kulkarni M, Dawson D, Sulaiibekh L, Chandrasekaran B, Bucciarelli-Ducci C, Pasquale F, Cowie MR, McKenna WJ, Sheppard MN, Elliott PM, Pennell DJ, Prasad SK. Prognostic significance**

**of myocardial fibrosis in hypertrophic cardiomyopathy. J Am Coll Cardiol. 2010;56:867-874.**

PubMed: <http://www.ncbi.nlm.nih.gov/pubmed/20688032?dopt=abstract>

CrossRef: <http://dx.doi.org/10.1016%2Fj.jacc.2010.05.010>

Google Scholar: [Author Only Title Only Author and Title](#)

**Rubinshtein R, Glockner JF, Ommen SR, Araoz PA, Ackerman MJ, Sorajja P, Bos JM, Tajik AJ, Valeti US, Nishimura RA, Gersh BJ. Characteristics and clinical significance of late gadolinium enhancement by contrast-enhanced magnetic resonance imaging in patients with hypertrophic cardiomyopathy. Circ Heart Fail. 2010;3:51-58.**

PubMed: <http://www.ncbi.nlm.nih.gov/pubmed/19850699?dopt=abstract>

CrossRef: <http://dx.doi.org/10.1161%2FCIRCHEARTFAILURE.109.854026>

Google Scholar: [Author Only Title Only Author and Title](#)

**Flett AS, Hasleton J, Cook C, Hausenloy D, Quarta G, Ariti C, Muthurangu V, Moon JC. Evaluation of techniques for the quantification of myocardial scar of differing etiology using cardiac magnetic resonance. Jacc. 2011;4:150-156.**

PubMed: <http://www.ncbi.nlm.nih.gov/pubmed/21329899?dopt=abstract>

Google Scholar: [Author Only Title Only Author and Title](#)

**Flett AS, Hayward MP, Ashworth MT, Hansen MS, Taylor AM, Elliott PM, McGregor C, Moon JC. Equilibrium contrast cardiovascular magnetic resonance for the measurement of diffuse myocardial fibrosis: preliminary validation in humans. Circulation. 2010;122:138-144.**

PubMed: <http://www.ncbi.nlm.nih.gov/pubmed/20585010?dopt=abstract>

CrossRef: <http://dx.doi.org/10.1161%2FCIRCULATIONAHA.109.930636>

Google Scholar: [Author Only Title Only Author and Title](#)

**Jerosch-Herold M, Sheridan DC, Kushner JD, Nauman D, Burgess D, Dutton D, Alharethi R, Li D, Hershberger RE. Cardiac magnetic resonance imaging of myocardial contrast uptake and blood flow in patients affected with idiopathic or familial dilated cardiomyopathy. Am J Physiol Heart Circ Physiol. 2008;295:H1234-H1242.**

PubMed: <http://www.ncbi.nlm.nih.gov/pubmed/18660445?dopt=abstract>

CrossRef: <http://dx.doi.org/10.1152%2Fajpheart.00429.2008>

Google Scholar: [Author Only Title Only Author and Title](#)

**Iles L, Pfluger H, Phrommintikul A, Cherayath J, Aksit P, Gupta SN, Kaye DM, Taylor AJ. Evaluation of diffuse myocardial fibrosis in heart failure with cardiac magnetic resonance contrast-enhanced T1 mapping. J Am Coll Cardiol. 2008;52:1574-1580.**

PubMed: <http://www.ncbi.nlm.nih.gov/pubmed/19007595?dopt=abstract>

CrossRef: <http://dx.doi.org/10.1016%2Fj.jacc.2008.06.049>

Google Scholar: [Author Only Title Only Author and Title](#)

**Broberg CS, Chugh SS, Conklin C, Sahn DJ, Jerosch-Herold M. Quantification of diffuse myocardial fibrosis and its association with myocardial dysfunction in congenital heart disease. Circ Cardiovasc Imaging. 2010;3:727-734.**

PubMed: <http://www.ncbi.nlm.nih.gov/pubmed/20855860?dopt=abstract>

CrossRef: <http://dx.doi.org/10.1161%2FCIRCIMAGING.108.842096>

Google Scholar: [Author Only Title Only Author and Title](#)

**Ugander M, Oki AJ, Hsu LY, Kellman P, Greiser A, Aletras AH, Sibley CT, Chen MY, Bandettini WP, Arai AE. Extracellular volume imaging by magnetic resonance imaging**

provides insights into overt and sub-clinical myocardial pathology. *Eur Heart J*. 2012;33:1268-1278.

Google Scholar: [Author Only Title Only Author and Title](#)

**Ng AC, Auger D, Delgado V, van Elderen SG, Bertini M, Siebelink HM, van der Geest RJ, Bonetti C, van der Velde ET, de Roos A, Smit JW, Leung DY, Bax JJ, Lamb HJ. Association between diffuse myocardial fibrosis by cardiac magnetic resonance contrast-enhanced T(1) mapping and subclinical myocardial dysfunction in diabetic patients: a pilot study. *Circ Cardiovasc Imaging*. 2012;5:51-59.**

**McKenna WJ, Spirito P, Desnos M, Dubourg O, Komajda M. Experience from clinical genetics in hypertrophic cardiomyopathy: proposal for new diagnostic criteria in adult members of affected families. *Heart*. 1997;77:130-132.**

PubMed: <http://www.ncbi.nlm.nih.gov/pubmed/9068395?dopt=abstract>

Google Scholar: [Author Only Title Only Author and Title](#)

**Steel K, Broderick R, Gandla V, Larose E, Resnic F, Jerosch-Herold M, Brown KA, Kwong RY. Complementary prognostic values of stress myocardial perfusion and late gadolinium enhancement imaging by cardiac magnetic resonance in patients with known or suspected coronary artery disease. *Circulation*. 2009;120:1390-1400.**

PubMed: <http://www.ncbi.nlm.nih.gov/pubmed/19770399?dopt=abstract>

CrossRef: <http://dx.doi.org/10.1161%2FCIRCULATIONAHA.108.812503>

Google Scholar: [Author Only Title Only Author and Title](#)

**Grothues F, Smith GC, Moon JC, Bellenger NG, Collins P, Klein HU, Pennell DJ. Comparison of interstudy reproducibility of cardiovascular magnetic resonance with two-dimensional echocardiography in normal subjects and in patients with heart failure or left ventricular hypertrophy. *The American journal of cardiology*. 2002;90:29-34.**

CrossRef: <http://dx.doi.org/10.1016%2FS0002-9149%2802%2902381-0>

Google Scholar: [Author Only Title Only Author and Title](#)

**Deichmann R, Hahn D, Haase A. Fast T1 mapping on a whole-body scanner. *Magn Reson Med*. 1999;42:206-209.**

PubMed: <http://www.ncbi.nlm.nih.gov/pubmed/10398969?dopt=abstract>

CrossRef: <http://dx.doi.org/10.1002%2F%28SICI%291522-2594%28199907%2942%3A1%3C206%3A%3AAID-MRM28%3E3.0.CO%3B2-Q>

Google Scholar: [Author Only Title Only Author and Title](#)

**Messroghli DR, Rudolph A, Abdel-Aty H, Wassmuth R, Kuhne T, Dietz R, Schulz-Menger J. An open-source software tool for the generation of relaxation time maps in magnetic resonance imaging. *BMC medical imaging*. 2010;10:16.**

**Lang RM, Bierig M, Devereux RB, Flachskampf FA, Foster E, Pellikka PA, Picard MH, Roman MJ, Seward J, Shanewise JS, Solomon SD, Spencer KT, Sutton MS, Stewart WJ. Recommendations for chamber quantification: a report from the American Society of Echocardiography's Guidelines and Standards Committee and the Chamber Quantification Writing Group, developed in conjunction with the European Association of Echocardiography, a branch of the European Society of Cardiology. *J Am Soc Echocardiogr*. 2005;18:1440-1463.**

CrossRef: <http://dx.doi.org/10.1016%2Fj.echo.2005.10.005>

Google Scholar: [Author Only Title Only Author and Title](#)

**Olivotto I, Girolami F, Ackerman MJ, Nistri S, Bos JM, Zachara E, Ommen SR, Theis JL, Vaubel RA, Re F, Armentano C, Poggesi C, Torricelli F, Cecchi F. Myofibrillar protein**

**gene mutation screening and outcome of patients with hypertrophic cardiomyopathy. Mayo Clin Proc. 2008;83:630-638.**

PubMed: <http://www.ncbi.nlm.nih.gov/pubmed/18533079?dopt=abstract>

Google Scholar: [Author Only Title Only Author and Title](#)

**Dass S, Suttie JJ, Piechnik SK, Ferreira VM, Holloway CJ, Banerjee R, Mahmood M, Cochlin L, Karamitsos TD, Robson MD, Watkins H, Neubauer S. Myocardial tissue characterization using magnetic resonance noncontrast t1 mapping in hypertrophic and dilated cardiomyopathy. Circ Cardiovasc Imaging.5:726-733.**

**Amano Y, Takayama M, Kumita S. Contrast-enhanced myocardial T1-weighted scout (Look-Locker) imaging for the detection of myocardial damages in hypertrophic cardiomyopathy. J Magn Reson Imaging. 2009;30:778-784.**

PubMed: <http://www.ncbi.nlm.nih.gov/pubmed/19787718?dopt=abstract>

CrossRef: <http://dx.doi.org/10.1002%2Fjmri.21921>

Google Scholar: [Author Only Title Only Author and Title](#)

**Ellims AH, Iles LM, Ling LH, Hare JL, Kaye DM, Taylor AJ. Diffuse myocardial fibrosis in hypertrophic cardiomyopathy can be identified by cardiovascular magnetic resonance, and is associated with left ventricular diastolic dysfunction. J Cardiovasc Magn Reson.14:76.**

**Kellman P, Wilson JR, Xue H, Bandettini WP, Shanbhag SM, Drucey KM, Ugander M, Arai AE. Extracellular volume fraction mapping in the myocardium, part 2: initial clinical experience. J Cardiovasc Magn Reson.14:64.**

**Zannad F, Alla F, Dousset B, Perez A, Pitt B. Limitation of excessive extracellular matrix turnover may contribute to survival benefit of spironolactone therapy in patients with congestive heart failure: insights from the randomized aldactone evaluation study (RALES). Rales Investigators. Circulation. 2000;102:2700-2706.**

PubMed: <http://www.ncbi.nlm.nih.gov/pubmed/11094035?dopt=abstract>

CrossRef: <http://dx.doi.org/10.1161%2F01.CIR.102.22.2700>

Google Scholar: [Author Only Title Only Author and Title](#)

**Diez J, Querejeta R, Lopez B, Gonzalez A, Larman M, Martinez Ubago JL. Losartan-dependent regression of myocardial fibrosis is associated with reduction of left ventricular chamber stiffness in hypertensive patients. Circulation. 2002;105:2512-2517.**

CrossRef: <http://dx.doi.org/10.1161%2F01.CIR.0000017264.66561.3D>

Google Scholar: [Author Only Title Only Author and Title](#)

**Lopez B, Querejeta R, Gonzalez A, Sanchez E, Larman M, Diez J. Effects of loop diuretics on myocardial fibrosis and collagen type I turnover in chronic heart failure. J Am Coll Cardiol. 2004;43:2028-2035.**

CrossRef: <http://dx.doi.org/10.1016%2Fj.jacc.2003.12.052>

Google Scholar: [Author Only Title Only Author and Title](#)

**Seidman JG, Seidman C. The genetic basis for cardiomyopathy: from mutation identification to mechanistic paradigms. Cell. 2001;104:557-567.**

PubMed: <http://www.ncbi.nlm.nih.gov/pubmed/11239412?dopt=abstract>

CrossRef: <http://dx.doi.org/10.1016%2F0092-8674%2801%2900242-2>

Google Scholar: [Author Only Title Only Author and Title](#)

**Richard P, Villard E, Charron P, Isnard R. The genetic bases of cardiomyopathies. J Am Coll Cardiol. 2006;48:A79-89.**

CrossRef: <http://dx.doi.org/10.1016%2Fj.jacc.2006.09.014>  
Google Scholar: [Author Only Title Only Author and Title](#)

**Ho CY, Sweitzer NK, McDonough B, Maron BJ, Casey SA, Seidman JG, Seidman CE, Solomon SD. Assessment of diastolic function with Doppler tissue imaging to predict genotype in preclinical hypertrophic cardiomyopathy. Circulation. 2002;105:2992-2997.**

PubMed: <http://www.ncbi.nlm.nih.gov/pubmed/12081993?dopt=abstract>  
CrossRef: <http://dx.doi.org/10.1161%2F01.CIR.0000019070.70491.6D>  
Google Scholar: [Author Only Title Only Author and Title](#)

**Ho CY, Carlsen C, Thune JJ, Havndrup O, Bundgaard H, Farrohi F, Rivero J, Cirino AL, Andersen PS, Christiansen M, Maron BJ, Orav EJ, Kober L. Echocardiographic Strain Imaging to Assess Early and Late Consequences of Sarcomere Mutations in Hypertrophic Cardiomyopathy. Circulation: Cardiovascular Genetics. 2009;2:314-321.**

PubMed: <http://www.ncbi.nlm.nih.gov/pubmed/20031602?dopt=abstract>  
Google Scholar: [Author Only Title Only Author and Title](#)

**Crilley JG, Boehm EA, Blair E, Rajagopalan B, Blamire AM, Styles P, McKenna WJ, Ostman-Smith I, Clarke K, Watkins H. Hypertrophic cardiomyopathy due to sarcomeric gene mutations is characterized by impaired energy metabolism irrespective of the degree of hypertrophy. J Am Coll Cardiol. 2003;41:1776-1782.**

PubMed: <http://www.ncbi.nlm.nih.gov/pubmed/12767664?dopt=abstract>  
CrossRef: <http://dx.doi.org/10.1016%2FS0735-1097%2802%2903009-7>  
Google Scholar: [Author Only Title Only Author and Title](#)

**Basso C, Thiene G, Corrado D, Buja G, Melacini P, Nava A. Hypertrophic cardiomyopathy and sudden death in the young: pathologic evidence of myocardial ischemia. Human pathology. 2000;31:988-998.**

PubMed: <http://www.ncbi.nlm.nih.gov/pubmed/10987261?dopt=abstract>  
CrossRef: <http://dx.doi.org/10.1053%2Fhupa.2000.16659>  
Google Scholar: [Author Only Title Only Author and Title](#)

**Shirani J, Pick R, Roberts WC, Maron BJ. Morphology and significance of the left ventricular collagen network in young patients with hypertrophic cardiomyopathy and sudden cardiac death. J Am Coll Cardiol. 2000;35:36-44.**

PubMed: <http://www.ncbi.nlm.nih.gov/pubmed/10636256?dopt=abstract>  
CrossRef: <http://dx.doi.org/10.1016%2FS0735-1097%2899%2900492-1>  
Google Scholar: [Author Only Title Only Author and Title](#)

**Choudhury L, Mahrholdt H, Wagner A, Choi KM, Elliott MD, Klocke FJ, Bonow RO, Judd RM, Kim RJ. Myocardial scarring in asymptomatic or mildly symptomatic patients with hypertrophic cardiomyopathy. J Am Coll Cardiol. 2002;40:2156-2164.**

PubMed: <http://www.ncbi.nlm.nih.gov/pubmed/12505229?dopt=abstract>  
CrossRef: <http://dx.doi.org/10.1016%2FS0735-1097%2802%2902602-5>  
Google Scholar: [Author Only Title Only Author and Title](#)

**Varnava AM, Elliott PM, Mahon N, Davies MJ, McKenna WJ. Relation between myocyte disarray and outcome in hypertrophic cardiomyopathy. The American journal of cardiology. 2001;88:275-279.**

PubMed: <http://www.ncbi.nlm.nih.gov/pubmed/11472707?dopt=abstract>  
CrossRef: <http://dx.doi.org/10.1016%2FS0002-9149%2801%2901640-X>  
Google Scholar: [Author Only Title Only Author and Title](#)

**Varnava AM, Elliott PM, Sharma S, McKenna WJ, Davies MJ. Hypertrophic cardiomyopathy: the interrelation of disarray, fibrosis, and small vessel disease. Heart. 2000;84:476-482.**

PubMed: <http://www.ncbi.nlm.nih.gov/pubmed/11040002?dopt=abstract>

CrossRef: <http://dx.doi.org/10.1136%2Fheart.84.5.476>

Google Scholar: [Author Only Title Only Author and Title](#)

**Kim JB, Porreca GJ, Song L, Greenway SC, Gorham JM, Church GM, Seidman CE, Seidman JG. Polony multiplex analysis of gene expression (PMAGE) in mouse hypertrophic cardiomyopathy. Science. 2007;316:1481-1484.**

PubMed: <http://www.ncbi.nlm.nih.gov/pubmed/17556586?dopt=abstract>

CrossRef: <http://dx.doi.org/10.1126%2Fscience.1137325>

Google Scholar: [Author Only Title Only Author and Title](#)

**Ho CY, Lopez B, Coelho-Filho OR, Lakdawala NK, Cirino AL, Jarolim P, Kwong R, Gonzalez A, Colan SD, Seidman JG, Diez J, Seidman CE. Myocardial fibrosis as an early manifestation of hypertrophic cardiomyopathy. N Engl J Med. 2010;363:552-563.**

PubMed: <http://www.ncbi.nlm.nih.gov/pubmed/20818890?dopt=abstract>

CrossRef: <http://dx.doi.org/10.1056%2FNEJMoa1002659>

Google Scholar: [Author Only Title Only Author and Title](#)

**Kim RJ, Fieno DS, Parrish TB, Harris K, Chen EL, Simonetti O, Bundy J, Finn JP, Klocke FJ, Judd RM. Relationship of MRI delayed contrast enhancement to irreversible injury, infarct age, and contractile function. Circulation. 1999;100:1992-2002.**

PubMed: <http://www.ncbi.nlm.nih.gov/pubmed/10556226?dopt=abstract>

CrossRef: <http://dx.doi.org/10.1161%2F01.CIR.100.19.1992>

Google Scholar: [Author Only Title Only Author and Title](#)

**Flacke SJ, Fischer SE, Lorenz CH. Measurement of the gadopentetate dimeglumine partition coefficient in human myocardium in vivo: normal distribution and elevation in acute and chronic infarction. Radiology. 2001;218:703-710.**

PubMed: <http://www.ncbi.nlm.nih.gov/pubmed/11230643?dopt=abstract>

Google Scholar: [Author Only Title Only Author and Title](#)

**Kim RJ, Chen EL, Lima JA, Judd RM. Myocardial Gd-DTPA kinetics determine MRI contrast enhancement and reflect the extent and severity of myocardial injury after acute reperfused infarction. Circulation. 1996;94:3318-3326.**

PubMed: <http://www.ncbi.nlm.nih.gov/pubmed/8989146?dopt=abstract>

CrossRef: <http://dx.doi.org/10.1161%2F01.CIR.94.12.3318>

Google Scholar: [Author Only Title Only Author and Title](#)

**Moon JC, McKenna WJ, McCrohon JA, Elliott PM, Smith GC, Pennell DJ. Toward clinical risk assessment in hypertrophic cardiomyopathy with gadolinium cardiovascular magnetic resonance. J Am Coll Cardiol. 2003;41:1561-1567.**

PubMed: <http://www.ncbi.nlm.nih.gov/pubmed/12742298?dopt=abstract>

CrossRef: <http://dx.doi.org/10.1016%2F0735-1097%2803%2900189-X>

Google Scholar: [Author Only Title Only Author and Title](#)

**Moon JC, Mogensen J, Elliott PM, Smith GC, Elkington AG, Prasad SK, Pennell DJ, McKenna WJ. Myocardial late gadolinium enhancement cardiovascular magnetic resonance in hypertrophic cardiomyopathy caused by mutations in troponin I. Heart. 2005;91:1036-1040.**



PubMed: <http://www.ncbi.nlm.nih.gov/pubmed/16020591?dopt=abstract>  
CrossRef: <http://dx.doi.org/10.1136%2Fhrt.2004.041384>  
Google Scholar: [Author Only Title Only Author and Title](#)

**Adabag AS, Maron BJ, Appelbaum E, Harrigan CJ, Buros JL, Gibson CM, Lesser JR, Hanna CA, Udelson JE, Manning WJ, Maron MS. Occurrence and frequency of arrhythmias in hypertrophic cardiomyopathy in relation to delayed enhancement on cardiovascular magnetic resonance. J Am Coll Cardiol. 2008;51:1369-1374.**

PubMed: <http://www.ncbi.nlm.nih.gov/pubmed/18387438?dopt=abstract>  
CrossRef: <http://dx.doi.org/10.1016%2Fj.jacc.2007.11.071>  
Google Scholar: [Author Only Title Only Author and Title](#)

**Maron MS, Appelbaum E, Harrigan CJ, Buros JL, Gibson CM, Hanna CA, Lesser JR, Udelson JE, Manning WJ, Maron BJ. Clinical Profile and Significance of Delayed Enhancement in Hypertrophic Cardiomyopathy. Circ Heart Fail. 2008;1:184-191.**

CrossRef: <http://dx.doi.org/10.1161%2FCIRCHEARTFAILURE.108.768119>  
Google Scholar: [Author Only Title Only Author and Title](#)

**Rudolph A, Abdel-Aty H, Bohl S, Boye P, Zagrosek A, Dietz R, Schulz-Menger J. Noninvasive detection of fibrosis applying contrast-enhanced cardiac magnetic resonance in different forms of left ventricular hypertrophy relation to remodeling. J Am Coll Cardiol. 2009;53:284-291.**

PubMed: <http://www.ncbi.nlm.nih.gov/pubmed/19147047?dopt=abstract>  
CrossRef: <http://dx.doi.org/10.1016%2Fj.jacc.2008.08.064>  
Google Scholar: [Author Only Title Only Author and Title](#)

**Bruder O, Wagner A, Jensen CJ, Schneider S, Ong P, Kispert EM, Nassenstein K, Schlosser T, Sabin GV, Sechtem U, Mahrholdt H. Myocardial scar visualized by cardiovascular magnetic resonance imaging predicts major adverse events in patients with hypertrophic cardiomyopathy. J Am Coll Cardiol. 2010;56:875-887.**

PubMed: <http://www.ncbi.nlm.nih.gov/pubmed/20667520?dopt=abstract>  
CrossRef: <http://dx.doi.org/10.1016%2Fj.jacc.2010.05.007>  
Google Scholar: [Author Only Title Only Author and Title](#)

**O'Hanlon R, Grasso A, Roughton M, Moon JC, Clark S, Wage R, Webb J, Kulkarni M, Dawson D, Sulaiibekh L, Chandrasekaran B, Bucciarelli-Ducci C, Pasquale F, Cowie MR, McKenna WJ, Sheppard MN, Elliott PM, Pennell DJ, Prasad SK. Prognostic significance of myocardial fibrosis in hypertrophic cardiomyopathy. J Am Coll Cardiol. 2010;56:867-874.**

PubMed: <http://www.ncbi.nlm.nih.gov/pubmed/20688032?dopt=abstract>  
CrossRef: <http://dx.doi.org/10.1016%2Fj.jacc.2010.05.010>  
Google Scholar: [Author Only Title Only Author and Title](#)

**Rubinshtein R, Glockner JF, Ommen SR, Araoz PA, Ackerman MJ, Sorajja P, Bos JM, Tajik AJ, Valeti US, Nishimura RA, Gersh BJ. Characteristics and clinical significance of late gadolinium enhancement by contrast-enhanced magnetic resonance imaging in patients with hypertrophic cardiomyopathy. Circ Heart Fail. 2010;3:51-58.**

PubMed: <http://www.ncbi.nlm.nih.gov/pubmed/19850699?dopt=abstract>  
CrossRef: <http://dx.doi.org/10.1161%2FCIRCHEARTFAILURE.109.854026>  
Google Scholar: [Author Only Title Only Author and Title](#)

**Flett AS, Hasleton J, Cook C, Hausenloy D, Quarta G, Ariti C, Muthurangu V, Moon JC. Evaluation of techniques for the quantification of myocardial scar of differing etiology using cardiac magnetic resonance. Jacc. 2011;4:150-156.**

PubMed: <http://www.ncbi.nlm.nih.gov/pubmed/21329899?dopt=abstract>

Google Scholar: [Author Only Title Only Author and Title](#)

**Flett AS, Hayward MP, Ashworth MT, Hansen MS, Taylor AM, Elliott PM, McGregor C, Moon JC. Equilibrium contrast cardiovascular magnetic resonance for the measurement of diffuse myocardial fibrosis: preliminary validation in humans. Circulation. 2010;122:138-144.**

PubMed: <http://www.ncbi.nlm.nih.gov/pubmed/20585010?dopt=abstract>

CrossRef: <http://dx.doi.org/10.1161%2FCIRCULATIONAHA.109.930636>

Google Scholar: [Author Only Title Only Author and Title](#)

**Jerosch-Herold M, Sheridan DC, Kushner JD, Nauman D, Burgess D, Dutton D, Alharethi R, Li D, Hershberger RE. Cardiac magnetic resonance imaging of myocardial contrast uptake and blood flow in patients affected with idiopathic or familial dilated cardiomyopathy. Am J Physiol Heart Circ Physiol. 2008;295:H1234-H1242.**

PubMed: <http://www.ncbi.nlm.nih.gov/pubmed/18660445?dopt=abstract>

CrossRef: <http://dx.doi.org/10.1152%2Fajpheart.00429.2008>

Google Scholar: [Author Only Title Only Author and Title](#)

**Iles L, Pfluger H, Phrommintikul A, Cherayath J, Aksit P, Gupta SN, Kaye DM, Taylor AJ. Evaluation of diffuse myocardial fibrosis in heart failure with cardiac magnetic resonance contrast-enhanced T1 mapping. J Am Coll Cardiol. 2008;52:1574-1580.**

PubMed: <http://www.ncbi.nlm.nih.gov/pubmed/19007595?dopt=abstract>

CrossRef: <http://dx.doi.org/10.1016%2Fj.jacc.2008.06.049>

Google Scholar: [Author Only Title Only Author and Title](#)

**Broberg CS, Chugh SS, Conklin C, Sahn DJ, Jerosch-Herold M. Quantification of diffuse myocardial fibrosis and its association with myocardial dysfunction in congenital heart disease. Circ Cardiovasc Imaging. 2010;3:727-734.**

PubMed: <http://www.ncbi.nlm.nih.gov/pubmed/20855860?dopt=abstract>

CrossRef: <http://dx.doi.org/10.1161%2FCIRCIMAGING.108.842096>

Google Scholar: [Author Only Title Only Author and Title](#)

**Ugander M, Oki AJ, Hsu LY, Kellman P, Greiser A, Aletras AH, Sibley CT, Chen MY, Bandettini WP, Arai AE. Extracellular volume imaging by magnetic resonance imaging provides insights into overt and sub-clinical myocardial pathology. Eur Heart J.33:1268-1278.**

Google Scholar: [Author Only Title Only Author and Title](#)

**Ng AC, Auger D, Delgado V, van Elderen SG, Bertini M, Siebelink HM, van der Geest RJ, Bonetti C, van der Velde ET, de Roos A, Smit JW, Leung DY, Bax JJ, Lamb HJ. Association between diffuse myocardial fibrosis by cardiac magnetic resonance contrast-enhanced T(1) mapping and subclinical myocardial dysfunction in diabetic patients: a pilot study. Circ Cardiovasc Imaging.5:51-59.**

**McKenna WJ, Spirito P, Desnos M, Dubourg O, Komajda M. Experience from clinical genetics in hypertrophic cardiomyopathy: proposal for new diagnostic criteria in adult members of affected families. Heart. 1997;77:130-132.**

PubMed: <http://www.ncbi.nlm.nih.gov/pubmed/9068395?dopt=abstract>

Google Scholar: [Author Only Title Only Author and Title](#)

Steel K, Broderick R, Gandla V, Larose E, Resnic F, Jerosch-Herold M, Brown KA, Kwong RY. Complementary prognostic values of stress myocardial perfusion and late gadolinium enhancement imaging by cardiac magnetic resonance in patients with known or suspected coronary artery disease. *Circulation*. 2009;120:1390-1400.

PubMed: <http://www.ncbi.nlm.nih.gov/pubmed/19770399?dopt=abstract>

CrossRef: <http://dx.doi.org/10.1161%2FCIRCULATIONAHA.108.812503>

Google Scholar: [Author Only Title Only Author and Title](#)

Grothues F, Smith GC, Moon JC, Bellenger NG, Collins P, Klein HU, Pennell DJ. Comparison of interstudy reproducibility of cardiovascular magnetic resonance with two-dimensional echocardiography in normal subjects and in patients with heart failure or left ventricular hypertrophy. *The American journal of cardiology*. 2002;90:29-34.

CrossRef: <http://dx.doi.org/10.1016%2FS0002-9149%2802%2902381-0>

Google Scholar: [Author Only Title Only Author and Title](#)

Deichmann R, Hahn D, Haase A. Fast T1 mapping on a whole-body scanner. *Magn Reson Med*. 1999;42:206-209.

PubMed: <http://www.ncbi.nlm.nih.gov/pubmed/10398969?dopt=abstract>

CrossRef: <http://dx.doi.org/10.1002%2F%28SICI%291522->

[2594%28199907%2942%3A1%3C206%3A%3AAID-MRM28%3E3.0.CO%3B2-Q](http://dx.doi.org/10.1002%2F%28SICI%291522-2594%28199907%2942%3A1%3C206%3A%3AAID-MRM28%3E3.0.CO%3B2-Q)

Google Scholar: [Author Only Title Only Author and Title](#)

**Messroghli DR, Rudolph A, Abdel-Aty H, Wassmuth R, Kuhne T, Dietz R, Schulz-Menger J. An open-source software tool for the generation of relaxation time maps in magnetic resonance imaging. *BMC medical imaging*.10:16.**

Lang RM, Bierig M, Devereux RB, Flachskampf FA, Foster E, Pellikka PA, Picard MH, Roman MJ, Seward J, Shanewise JS, Solomon SD, Spencer KT, Sutton MS, Stewart WJ. Recommendations for chamber quantification: a report from the American Society of Echocardiography's Guidelines and Standards Committee and the Chamber Quantification Writing Group, developed in conjunction with the European Association of Echocardiography, a branch of the European Society of Cardiology. *J Am Soc Echocardiogr*. 2005;18:1440-1463.

CrossRef: <http://dx.doi.org/10.1016%2Fj.echo.2005.10.005>

Google Scholar: [Author Only Title Only Author and Title](#)

Olivotto I, Girolami F, Ackerman MJ, Nistri S, Bos JM, Zachara E, Ommen SR, Theis JL, Vaubel RA, Re F, Armentano C, Poggesi C, Torricelli F, Cecchi F. Myofilament protein gene mutation screening and outcome of patients with hypertrophic cardiomyopathy. *Mayo Clin Proc*. 2008;83:630-638.

PubMed: <http://www.ncbi.nlm.nih.gov/pubmed/18533079?dopt=abstract>

Google Scholar: [Author Only Title Only Author and Title](#)

**Dass S, Suttie JJ, Piechnik SK, Ferreira VM, Holloway CJ, Banerjee R, Mahmood M, Cochlin L, Karamitsos TD, Robson MD, Watkins H, Neubauer S. Myocardial tissue characterization using magnetic resonance noncontrast t1 mapping in hypertrophic and dilated cardiomyopathy. *Circ Cardiovasc Imaging*.5:726-733.**

Amano Y, Takayama M, Kumita S. Contrast-enhanced myocardial T1-weighted scout (Look-Locker) imaging for the detection of myocardial damages in hypertrophic cardiomyopathy. *J Magn Reson Imaging*. 2009;30:778-784.

PubMed: <http://www.ncbi.nlm.nih.gov/pubmed/19787718?dopt=abstract>

CrossRef: <http://dx.doi.org/10.1002%2Fjmri.21921>

Google Scholar: [Author Only Title Only Author and Title](#)

**Ellims AH, Iles LM, Ling LH, Hare JL, Kaye DM, Taylor AJ. Diffuse myocardial fibrosis in hypertrophic cardiomyopathy can be identified by cardiovascular magnetic resonance, and is associated with left ventricular diastolic dysfunction. J Cardiovasc Magn Reson.14:76.**

**Kellman P, Wilson JR, Xue H, Bandettini WP, Shanbhag SM, Druey KM, Ugander M, Arai AE. Extracellular volume fraction mapping in the myocardium, part 2: initial clinical experience. J Cardiovasc Magn Reson.14:64.**

**Zannad F, Alla F, Dousset B, Perez A, Pitt B. Limitation of excessive extracellular matrix turnover may contribute to survival benefit of spironolactone therapy in patients with congestive heart failure: insights from the randomized aldactone evaluation study (RALES). Rales Investigators. Circulation. 2000;102:2700-2706.**

PubMed: <http://www.ncbi.nlm.nih.gov/pubmed/11094035?dopt=abstract>

CrossRef: <http://dx.doi.org/10.1161%2F01.CIR.102.22.2700>

Google Scholar: [Author Only Title Only Author and Title](#)

**Diez J, Querejeta R, Lopez B, Gonzalez A, Larman M, Martinez Ubago JL. Losartan-dependent regression of myocardial fibrosis is associated with reduction of left ventricular chamber stiffness in hypertensive patients. Circulation. 2002;105:2512-2517.**

CrossRef: <http://dx.doi.org/10.1161%2F01.CIR.0000017264.66561.3D>

Google Scholar: [Author Only Title Only Author and Title](#)

**Lopez B, Querejeta R, Gonzalez A, Sanchez E, Larman M, Diez J. Effects of loop diuretics on myocardial fibrosis and collagen type I turnover in chronic heart failure. J Am Coll Cardiol. 2004;43:2028-2035.**

CrossRef: <http://dx.doi.org/10.1016%2Fj.jacc.2003.12.052>

Google Scholar: [Author Only Title Only Author and Title](#)

**Seidman JG, Seidman C. The genetic basis for cardiomyopathy: from mutation identification to mechanistic paradigms. Cell. 2001;104:557-567.**

PubMed: <http://www.ncbi.nlm.nih.gov/pubmed/11239412?dopt=abstract>

CrossRef: <http://dx.doi.org/10.1016%2F0092-8674%2801%2900242-2>

Google Scholar: [Author Only Title Only Author and Title](#)

**Richard P, Villard E, Charron P, Isnard R. The genetic bases of cardiomyopathies. J Am Coll Cardiol. 2006;48:A79-89.**

CrossRef: <http://dx.doi.org/10.1016%2Fj.jacc.2006.09.014>

Google Scholar: [Author Only Title Only Author and Title](#)

**Ho CY, Sweitzer NK, McDonough B, Maron BJ, Casey SA, Seidman JG, Seidman CE, Solomon SD. Assessment of diastolic function with Doppler tissue imaging to predict genotype in preclinical hypertrophic cardiomyopathy. Circulation. 2002;105:2992-2997.**

PubMed: <http://www.ncbi.nlm.nih.gov/pubmed/12081993?dopt=abstract>

CrossRef: <http://dx.doi.org/10.1161%2F01.CIR.0000019070.70491.6D>

Google Scholar: [Author Only Title Only Author and Title](#)

**Ho CY, Carlsen C, Thune JJ, Havndrup O, Bundgaard H, Farrohi F, Rivero J, Cirino AL, Andersen PS, Christiansen M, Maron BJ, Orav EJ, Kober L. Echocardiographic Strain Imaging to Assess Early and Late Consequences of Sarcomere Mutations in Hypertrophic Cardiomyopathy. Circulation: Cardiovascular Genetics. 2009;2:314-321.**

PubMed: <http://www.ncbi.nlm.nih.gov/pubmed/20031602?dopt=abstract>

Google Scholar: [Author Only Title Only Author and Title](#)

**Crilley JG, Boehm EA, Blair E, Rajagopalan B, Blamire AM, Styles P, McKenna WJ, Ostman-Smith I, Clarke K, Watkins H. Hypertrophic cardiomyopathy due to sarcomeric gene mutations is characterized by impaired energy metabolism irrespective of the degree of hypertrophy. J Am Coll Cardiol. 2003;41:1776-1782.**

PubMed: <http://www.ncbi.nlm.nih.gov/pubmed/12767664?dopt=abstract>

CrossRef: <http://dx.doi.org/10.1016%2FS0735-1097%2802%2903009-7>

Google Scholar: [Author Only Title Only Author and Title](#)

**Basso C, Thiene G, Corrado D, Buja G, Melacini P, Nava A. Hypertrophic cardiomyopathy and sudden death in the young: pathologic evidence of myocardial ischemia. Human pathology. 2000;31:988-998.**

PubMed: <http://www.ncbi.nlm.nih.gov/pubmed/10987261?dopt=abstract>

CrossRef: <http://dx.doi.org/10.1053%2Fhupa.2000.16659>

Google Scholar: [Author Only Title Only Author and Title](#)

**Shirani J, Pick R, Roberts WC, Maron BJ. Morphology and significance of the left ventricular collagen network in young patients with hypertrophic cardiomyopathy and sudden cardiac death. J Am Coll Cardiol. 2000;35:36-44.**

PubMed: <http://www.ncbi.nlm.nih.gov/pubmed/10636256?dopt=abstract>

CrossRef: <http://dx.doi.org/10.1016%2FS0735-1097%2899%2900492-1>

Google Scholar: [Author Only Title Only Author and Title](#)

**Choudhury L, Mahrholdt H, Wagner A, Choi KM, Elliott MD, Klocke FJ, Bonow RO, Judd RM, Kim RJ. Myocardial scarring in asymptomatic or mildly symptomatic patients with hypertrophic cardiomyopathy. J Am Coll Cardiol. 2002;40:2156-2164.**

PubMed: <http://www.ncbi.nlm.nih.gov/pubmed/12505229?dopt=abstract>

CrossRef: <http://dx.doi.org/10.1016%2FS0735-1097%2802%2902602-5>

Google Scholar: [Author Only Title Only Author and Title](#)

**Varnava AM, Elliott PM, Mahon N, Davies MJ, McKenna WJ. Relation between myocyte disarray and outcome in hypertrophic cardiomyopathy. The American journal of cardiology. 2001;88:275-279.**

PubMed: <http://www.ncbi.nlm.nih.gov/pubmed/11472707?dopt=abstract>

CrossRef: <http://dx.doi.org/10.1016%2FS0002-9149%2801%2901640-X>

Google Scholar: [Author Only Title Only Author and Title](#)

**Varnava AM, Elliott PM, Sharma S, McKenna WJ, Davies MJ. Hypertrophic cardiomyopathy: the interrelation of disarray, fibrosis, and small vessel disease. Heart. 2000;84:476-482.**

PubMed: <http://www.ncbi.nlm.nih.gov/pubmed/11040002?dopt=abstract>

CrossRef: <http://dx.doi.org/10.1136%2Fheart.84.5.476>

Google Scholar: [Author Only Title Only Author and Title](#)

**Kim JB, Porreca GJ, Song L, Greenway SC, Gorham JM, Church GM, Seidman CE, Seidman JG. Polony multiplex analysis of gene expression (PMAGE) in mouse hypertrophic cardiomyopathy. Science. 2007;316:1481-1484.**

PubMed: <http://www.ncbi.nlm.nih.gov/pubmed/17556586?dopt=abstract>

CrossRef: <http://dx.doi.org/10.1126%2Fscience.1137325>

Google Scholar: [Author Only Title Only Author and Title](#)

**Ho CY, Lopez B, Coelho-Filho OR, Lakdawala NK, Cirino AL, Jarolim P, Kwong R, Gonzalez A, Colan SD, Seidman JG, Diez J, Seidman CE. Myocardial fibrosis as an early manifestation of hypertrophic cardiomyopathy. N Engl J Med. 2010;363:552-563.**

PubMed: <http://www.ncbi.nlm.nih.gov/pubmed/20818890?dopt=abstract>  
CrossRef: <http://dx.doi.org/10.1056%2FNEJMoa1002659>  
Google Scholar: [Author Only Title Only Author and Title](#)

**Kim RJ, Fieno DS, Parrish TB, Harris K, Chen EL, Simonetti O, Bundy J, Finn JP, Klocke FJ, Judd RM. Relationship of MRI delayed contrast enhancement to irreversible injury, infarct age, and contractile function. Circulation. 1999;100:1992-2002.**

PubMed: <http://www.ncbi.nlm.nih.gov/pubmed/10556226?dopt=abstract>  
CrossRef: <http://dx.doi.org/10.1161%2F01.CIR.100.19.1992>  
Google Scholar: [Author Only Title Only Author and Title](#)

**Flacke SJ, Fischer SE, Lorenz CH. Measurement of the gadopentetate dimeglumine partition coefficient in human myocardium in vivo: normal distribution and elevation in acute and chronic infarction. Radiology. 2001;218:703-710.**

PubMed: <http://www.ncbi.nlm.nih.gov/pubmed/11230643?dopt=abstract>  
Google Scholar: [Author Only Title Only Author and Title](#)

**Kim RJ, Chen EL, Lima JA, Judd RM. Myocardial Gd-DTPA kinetics determine MRI contrast enhancement and reflect the extent and severity of myocardial injury after acute reperfused infarction. Circulation. 1996;94:3318-3326.**

PubMed: <http://www.ncbi.nlm.nih.gov/pubmed/8989146?dopt=abstract>  
CrossRef: <http://dx.doi.org/10.1161%2F01.CIR.94.12.3318>  
Google Scholar: [Author Only Title Only Author and Title](#)

**Moon JC, McKenna WJ, McCrohon JA, Elliott PM, Smith GC, Pennell DJ. Toward clinical risk assessment in hypertrophic cardiomyopathy with gadolinium cardiovascular magnetic resonance. J Am Coll Cardiol. 2003;41:1561-1567.**

PubMed: <http://www.ncbi.nlm.nih.gov/pubmed/12742298?dopt=abstract>  
CrossRef: <http://dx.doi.org/10.1016%2F0735-1097%2803%2900189-X>  
Google Scholar: [Author Only Title Only Author and Title](#)

**Moon JC, Mogensen J, Elliott PM, Smith GC, Elkington AG, Prasad SK, Pennell DJ, McKenna WJ. Myocardial late gadolinium enhancement cardiovascular magnetic resonance in hypertrophic cardiomyopathy caused by mutations in troponin I. Heart. 2005;91:1036-1040.**

PubMed: <http://www.ncbi.nlm.nih.gov/pubmed/16020591?dopt=abstract>  
CrossRef: <http://dx.doi.org/10.1136%2Fhrt.2004.041384>  
Google Scholar: [Author Only Title Only Author and Title](#)

**Adabag AS, Maron BJ, Appelbaum E, Harrigan CJ, Buros JL, Gibson CM, Lesser JR, Hanna CA, Udelson JE, Manning WJ, Maron MS. Occurrence and frequency of arrhythmias in hypertrophic cardiomyopathy in relation to delayed enhancement on cardiovascular magnetic resonance. J Am Coll Cardiol. 2008;51:1369-1374.**

PubMed: <http://www.ncbi.nlm.nih.gov/pubmed/18387438?dopt=abstract>  
CrossRef: <http://dx.doi.org/10.1016%2Fj.jacc.2007.11.071>  
Google Scholar: [Author Only Title Only Author and Title](#)

**Maron MS, Appelbaum E, Harrigan CJ, Buros JL, Gibson CM, Hanna CA, Lesser JR, Udelson JE, Manning WJ, Maron BJ. Clinical Profile and Significance of Delayed Enhancement in Hypertrophic Cardiomyopathy. Circ Heart Fail. 2008;1:184-191.**

CrossRef: <http://dx.doi.org/10.1161%2FCIRCHEARTFAILURE.108.768119>  
Google Scholar: [Author Only Title Only Author and Title](#)

**Rudolph A, Abdel-Aty H, Bohl S, Boye P, Zagrosek A, Dietz R, Schulz-Menger J. Noninvasive detection of fibrosis applying contrast-enhanced cardiac magnetic resonance in different forms of left ventricular hypertrophy relation to remodeling. J Am Coll Cardiol. 2009;53:284-291.**

PubMed: <http://www.ncbi.nlm.nih.gov/pubmed/19147047?dopt=abstract>

CrossRef: <http://dx.doi.org/10.1016%2Fj.jacc.2008.08.064>

Google Scholar: [Author Only Title Only Author and Title](#)

**Bruder O, Wagner A, Jensen CJ, Schneider S, Ong P, Kispert EM, Nassenstein K, Schlosser T, Sabin GV, Sechtem U, Mahrholdt H. Myocardial scar visualized by cardiovascular magnetic resonance imaging predicts major adverse events in patients with hypertrophic cardiomyopathy. J Am Coll Cardiol. 2010;56:875-887.**

PubMed: <http://www.ncbi.nlm.nih.gov/pubmed/20667520?dopt=abstract>

CrossRef: <http://dx.doi.org/10.1016%2Fj.jacc.2010.05.007>

Google Scholar: [Author Only Title Only Author and Title](#)

**O'Hanlon R, Grasso A, Roughton M, Moon JC, Clark S, Wage R, Webb J, Kulkarni M, Dawson D, Sulaibekkh L, Chandrasekaran B, Bucciarelli-Ducci C, Pasquale F, Cowie MR, McKenna WJ, Sheppard MN, Elliott PM, Pennell DJ, Prasad SK. Prognostic significance of myocardial fibrosis in hypertrophic cardiomyopathy. J Am Coll Cardiol. 2010;56:867-874.**

PubMed: <http://www.ncbi.nlm.nih.gov/pubmed/20688032?dopt=abstract>

CrossRef: <http://dx.doi.org/10.1016%2Fj.jacc.2010.05.010>

Google Scholar: [Author Only Title Only Author and Title](#)

**Rubinshtein R, Glockner JF, Ommen SR, Araoz PA, Ackerman MJ, Sorajja P, Bos JM, Tajik AJ, Valeti US, Nishimura RA, Gersh BJ. Characteristics and clinical significance of late gadolinium enhancement by contrast-enhanced magnetic resonance imaging in patients with hypertrophic cardiomyopathy. Circ Heart Fail. 2010;3:51-58.**

PubMed: <http://www.ncbi.nlm.nih.gov/pubmed/19850699?dopt=abstract>

CrossRef: <http://dx.doi.org/10.1161%2FCIRCHEARTFAILURE.109.854026>

Google Scholar: [Author Only Title Only Author and Title](#)

**Flett AS, Hasleton J, Cook C, Hausenloy D, Quarta G, Ariti C, Muthurangu V, Moon JC. Evaluation of techniques for the quantification of myocardial scar of differing etiology using cardiac magnetic resonance. Jacc. 2011;4:150-156.**

PubMed: <http://www.ncbi.nlm.nih.gov/pubmed/21329899?dopt=abstract>

Google Scholar: [Author Only Title Only Author and Title](#)

**Flett AS, Hayward MP, Ashworth MT, Hansen MS, Taylor AM, Elliott PM, McGregor C, Moon JC. Equilibrium contrast cardiovascular magnetic resonance for the measurement of diffuse myocardial fibrosis: preliminary validation in humans. Circulation. 2010;122:138-144.**

PubMed: <http://www.ncbi.nlm.nih.gov/pubmed/20585010?dopt=abstract>

CrossRef: <http://dx.doi.org/10.1161%2FCIRCULATIONAHA.109.930636>

Google Scholar: [Author Only Title Only Author and Title](#)

**Jerosch-Herold M, Sheridan DC, Kushner JD, Nauman D, Burgess D, Dutton D, Alharethi R, Li D, Hershberger RE. Cardiac magnetic resonance imaging of myocardial contrast uptake and blood flow in patients affected with idiopathic or familial dilated cardiomyopathy. Am J Physiol Heart Circ Physiol. 2008;295:H1234-H1242.**

PubMed: <http://www.ncbi.nlm.nih.gov/pubmed/18660445?dopt=abstract>  
CrossRef: <http://dx.doi.org/10.1152%2Fajpheart.00429.2008>  
Google Scholar: [Author Only Title Only Author and Title](#)

**Iles L, Pfluger H, Phrommintikul A, Cherayath J, Aksit P, Gupta SN, Kaye DM, Taylor AJ. Evaluation of diffuse myocardial fibrosis in heart failure with cardiac magnetic resonance contrast-enhanced T1 mapping. J Am Coll Cardiol. 2008;52:1574-1580.**

PubMed: <http://www.ncbi.nlm.nih.gov/pubmed/19007595?dopt=abstract>  
CrossRef: <http://dx.doi.org/10.1016%2Fj.jacc.2008.06.049>  
Google Scholar: [Author Only Title Only Author and Title](#)

**Broberg CS, Chugh SS, Conklin C, Sahn DJ, Jerosch-Herold M. Quantification of diffuse myocardial fibrosis and its association with myocardial dysfunction in congenital heart disease. Circ Cardiovasc Imaging. 2010;3:727-734.**

PubMed: <http://www.ncbi.nlm.nih.gov/pubmed/20855860?dopt=abstract>  
CrossRef: <http://dx.doi.org/10.1161%2FCIRCIMAGING.108.842096>  
Google Scholar: [Author Only Title Only Author and Title](#)

**Ugander M, Oki AJ, Hsu LY, Kellman P, Greiser A, Aletras AH, Sibley CT, Chen MY, Bandettini WP, Arai AE. Extracellular volume imaging by magnetic resonance imaging provides insights into overt and sub-clinical myocardial pathology. Eur Heart J.33:1268-1278.**

Google Scholar: [Author Only Title Only Author and Title](#)

**Ng AC, Auger D, Delgado V, van Elderen SG, Bertini M, Siebelink HM, van der Geest RJ, Bonetti C, van der Velde ET, de Roos A, Smit JW, Leung DY, Bax JJ, Lamb HJ. Association between diffuse myocardial fibrosis by cardiac magnetic resonance contrast-enhanced T(1) mapping and subclinical myocardial dysfunction in diabetic patients: a pilot study. Circ Cardiovasc Imaging. 2012;5:51-59.**

PubMed: <http://www.ncbi.nlm.nih.gov/pubmed/22135399?dopt=abstract>  
CrossRef: <http://dx.doi.org/10.1161%2FCIRCIMAGING.111.965608>  
Google Scholar: [Author Only Title Only Author and Title](#)

**McKenna WJ, Spirito P, Desnos M, Dubourg O, Komajda M. Experience from clinical genetics in hypertrophic cardiomyopathy: proposal for new diagnostic criteria in adult members of affected families. Heart. 1997;77:130-132.**

PubMed: <http://www.ncbi.nlm.nih.gov/pubmed/9068395?dopt=abstract>  
Google Scholar: [Author Only Title Only Author and Title](#)

**Steel K, Broderick R, Gandla V, Larose E, Resnic F, Jerosch-Herold M, Brown KA, Kwong RY. Complementary prognostic values of stress myocardial perfusion and late gadolinium enhancement imaging by cardiac magnetic resonance in patients with known or suspected coronary artery disease. Circulation. 2009;120:1390-1400.**

PubMed: <http://www.ncbi.nlm.nih.gov/pubmed/19770399?dopt=abstract>  
CrossRef: <http://dx.doi.org/10.1161%2FCIRCULATIONAHA.108.812503>  
Google Scholar: [Author Only Title Only Author and Title](#)

**Grothues F, Smith GC, Moon JC, Bellenger NG, Collins P, Klein HU, Pennell DJ. Comparison of interstudy reproducibility of cardiovascular magnetic resonance with two-dimensional echocardiography in normal subjects and in patients with heart failure or left ventricular hypertrophy. The American journal of cardiology. 2002;90:29-34.**



CrossRef: <http://dx.doi.org/10.1016%2FS0002-9149%2802%2902381-0>

Google Scholar: [Author Only Title Only Author and Title](#)

**Deichmann R, Hahn D, Haase A. Fast T1 mapping on a whole-body scanner. Magn Reson Med. 1999;42:206-209.**

PubMed: <http://www.ncbi.nlm.nih.gov/pubmed/10398969?dopt=abstract>

CrossRef: <http://dx.doi.org/10.1002%2F%28SICI%291522->

[2594%28199907%2942%3A1%3C206%3A%3AAID-MRM28%3E3.0.CO%3B2-Q](http://dx.doi.org/10.1002%2F%28SICI%291522-2594%28199907%2942%3A1%3C206%3A%3AAID-MRM28%3E3.0.CO%3B2-Q)

Google Scholar: [Author Only Title Only Author and Title](#)

**Messroghli DR, Rudolph A, Abdel-Aty H, Wassmuth R, Kuhne T, Dietz R, Schulz-Menger J. An open-source software tool for the generation of relaxation time maps in magnetic resonance imaging. BMC medical imaging. 2010;10:16.**

PubMed: <http://www.ncbi.nlm.nih.gov/pubmed/20673350?dopt=abstract>

CrossRef: <http://dx.doi.org/10.1186%2F1471-2342-10-16>

Google Scholar: [Author Only Title Only Author and Title](#)

**Lang RM, Bierig M, Devereux RB, Flachskampf FA, Foster E, Pellikka PA, Picard MH, Roman MJ, Seward J, Shanewise JS, Solomon SD, Spencer KT, Sutton MS, Stewart WJ. Recommendations for chamber quantification: a report from the American Society of Echocardiography's Guidelines and Standards Committee and the Chamber Quantification Writing Group, developed in conjunction with the European Association of Echocardiography, a branch of the European Society of Cardiology. J Am Soc Echocardiogr. 2005;18:1440-1463.**

CrossRef: <http://dx.doi.org/10.1016%2Fj.echo.2005.10.005>

Google Scholar: [Author Only Title Only Author and Title](#)

**Olivotto I, Girolami F, Ackerman MJ, Nistri S, Bos JM, Zachara E, Ommen SR, Theis JL, Vaubel RA, Re F, Armentano C, Poggesi C, Torricelli F, Cecchi F. Myofibrillar protein gene mutation screening and outcome of patients with hypertrophic cardiomyopathy. Mayo Clin Proc. 2008;83:630-638.**

PubMed: <http://www.ncbi.nlm.nih.gov/pubmed/18533079?dopt=abstract>

Google Scholar: [Author Only Title Only Author and Title](#)

**Dass S, Suttie JJ, Piechnik SK, Ferreira VM, Holloway CJ, Banerjee R, Mahmood M, Cochlin L, Karamitsos TD, Robson MD, Watkins H, Neubauer S. Myocardial tissue characterization using magnetic resonance noncontrast t1 mapping in hypertrophic and dilated cardiomyopathy. Circ Cardiovasc Imaging. 2012;5:726-733.**

CrossRef: <http://dx.doi.org/10.1161%2FCIRCIMAGING.112.976738>

Google Scholar: [Author Only Title Only Author and Title](#)

**Amano Y, Takayama M, Kumita S. Contrast-enhanced myocardial T1-weighted scout (Look-Locker) imaging for the detection of myocardial damages in hypertrophic cardiomyopathy. J Magn Reson Imaging. 2009;30:778-784.**

PubMed: <http://www.ncbi.nlm.nih.gov/pubmed/19787718?dopt=abstract>

CrossRef: <http://dx.doi.org/10.1002%2Fjmri.21921>

Google Scholar: [Author Only Title Only Author and Title](#)

**Ellims AH, Iles LM, Ling LH, Hare JL, Kaye DM, Taylor AJ. Diffuse myocardial fibrosis in hypertrophic cardiomyopathy can be identified by cardiovascular magnetic resonance, and is associated with left ventricular diastolic dysfunction. J Cardiovasc Magn Reson. 2012;14:76.**

PubMed: <http://www.ncbi.nlm.nih.gov/pubmed/23107451?dopt=abstract>  
CrossRef: <http://dx.doi.org/10.1186%2F1532-429X-14-76>  
Google Scholar: [Author Only Title Only Author and Title](#)

**Kellman P, Wilson JR, Xue H, Bandettini WP, Shanbhag SM, Druey KM, Ugander M, Arai AE. Extracellular volume fraction mapping in the myocardium, part 2: initial clinical experience. J Cardiovasc Magn Reson. 2012;14:64.**

PubMed: <http://www.ncbi.nlm.nih.gov/pubmed/22967246?dopt=abstract>  
CrossRef: <http://dx.doi.org/10.1186%2F1532-429X-14-64>  
Google Scholar: [Author Only Title Only Author and Title](#)

**Zannad F, Alla F, Dousset B, Perez A, Pitt B. Limitation of excessive extracellular matrix turnover may contribute to survival benefit of spironolactone therapy in patients with congestive heart failure: insights from the randomized aldactone evaluation study (RALES). Rales Investigators. Circulation. 2000;102:2700-2706.**

PubMed: <http://www.ncbi.nlm.nih.gov/pubmed/11094035?dopt=abstract>  
CrossRef: <http://dx.doi.org/10.1161%2F01.CIR.102.22.2700>  
Google Scholar: [Author Only Title Only Author and Title](#)

**Diez J, Querejeta R, Lopez B, Gonzalez A, Larman M, Martinez Ubago JL. Losartan-dependent regression of myocardial fibrosis is associated with reduction of left ventricular chamber stiffness in hypertensive patients. Circulation. 2002;105:2512-2517.**

CrossRef: <http://dx.doi.org/10.1161%2F01.CIR.0000017264.66561.3D>  
Google Scholar: [Author Only Title Only Author and Title](#)

**Lopez B, Querejeta R, Gonzalez A, Sanchez E, Larman M, Diez J. Effects of loop diuretics on myocardial fibrosis and collagen type I turnover in chronic heart failure. J Am Coll Cardiol. 2004;43:2028-2035.**

CrossRef: <http://dx.doi.org/10.1016%2Fj.jacc.2003.12.052>  
Google Scholar: [Author Only Title Only Author and Title](#)
